# Supplementary material for: Parental Decision Regret after Consenting to or Refusing Hypospadias Repair: an Australian Survey
Source: Research Square preprint supplement (doi:10.21203/rs.3.rs-1133041/v1), 2021-12-03
Supplement: Supplementary file 1 [file 49aba94b59f910470fe24819.docx]

Additional file 1. PARENTAL PERSPECTIVES IN SURGERY ON THE PENIS IN A CHILD: An Anonymous Online Survey questions.

| Question | Answer options |
| --- | --- |
| Has your child had his hypospadias repaired or has he had a circumcision? | My child has had the hypospadias repaired My child has hypospadias, but I (we) decided not to have it repaired for now My child had an elective circumcision |
| In a large study published in 2020, 80% of men are satisfied with their childhood hypospadias repair. From your perspective, the decision you made was the right decision *(preamble specific to the repair group)*  It was the right decision | Strongly agree Agree Neither agree nor disagree Disagree Strongly disagree |
| I regret the choice that was made | Strongly agree Agree Neither agree nor disagree Disagree Strongly disagree |
| I would make the same decision if I had to do it again | Strongly agree Agree  Neither agree nor disagree Disagree Strongly disagree |
| The choice did my son a lot of harm | Strongly agree Agree Neither agree nor disagree Disagree  Strongly disagree |
| It was a correct decision | Strongly agree Agree  Neither agree nor disagree Disagree  Strongly disagree |
| Recently, a user-centred decision aid prototype was developed which, based on testimonials of parents and adolescents describing their experiences, and frequently asked questions, gives the parents more information about the basics of hypospadias surgery. In light of this, do you feel you were adequately supported in your decision regarding your son's hypospadias care? *(question specific to repair and declined repair groups)* | Yes  No |
| Your decision was mostly guided by  *(question specific to the repair group)* | Appearance of the penis Appearance of the foreskin Concerns about urinary function Concerns about sexual function  Concerns about fertility Other (please specify) |
| The MOST satisfying part of the outcome is  *(question specific to the repair group)* | Appearance of the foreskin Penis is straight Urine coming out of the tip of the penis My son will not have body image issues in the future Other (please specify) |
| The LEAST satisfying part of the outcome is  *(question specific to the repair group)* | Appearance of the foreskin Penis is not straight Urine not coming out of the tip of the penis My son had to have several procedures Other (please specify) |
| Before knowing that your son had hypospadias, were you keen to have him circumcised?  *(question specific to repair and declined repair groups)* | Yes  No I did not have a strong opinion about it Not sure |
| What's your gender? | Female Male |
| How old were you at the time you made the decision on behalf of your child? | Under 18  18-24 25-34 35-44 45-54 55-64 65+ |
| What is the postcode of your child's residence? |  |
| What is the highest completed level of your education? | Primary School  High school Vocational University Postgraduate degree |
| What could have helped you be more content with your decision?  *(question specific to repair and declined repair groups)* | More appointments with the surgeon  A hypospadias parental decision-making aid  More research on the Internet  More time  Other |
