# Supplementary material for: Parental Decision Regret after Consenting to or Refusing Hypospadias Repair: an Australian Survey
Source: Research Square preprint supplement (doi:10.21203/rs.3.rs-1133041/v1), 2021-12-03
Supplement: Supplementary file 2 [file bfd8aff2c1b89756461cd1d7.docx]

| Question and answer options | Group 1 (consented to repair), n | Group 2 (declined repair), n |
| --- | --- | --- |
| **Recently, a user-centred decision aid prototype was developed which, based on testimonials of parents and adolescents describing their experiences, and frequently asked questions, gives the parents more information about the basics of hypospadias surgery. In light of this, do you feel you were adequately supported in your decision regarding your son's hypospadias care?** | | |
| Yes | 73 | 11 |
| No | 14 | 3 |
| **Your decision was mostly guided by**  **(question specific to group 1)** | | |
| Appearance of the penis | 36 | N/A |
| Appearance of the foreskin | 23 | N/A |
| Concerns about urinary function | 74 | N/A |
| Concerns about sexual function | 35 | N/A |
| Concerns about fertility | 23 | N/A |
| Other (please specify) | 4 | N/A |
| **The MOST satisfying part of the outcome is**  **(question specific to group 1)** | | |
| Appearance of the foreskin | 11 | N/A |
| Penis is straight | 18 | N/A |
| Urine coming out of the tip of the penis | 63 | N/A |
| My son will not have body image issues in the future | 34 | N/A |
| Other (please specify) | 10 | N/A |
| **The LEAST satisfying part of the outcome is**  **(question specific to group 1)** | | |
| Appearance of the foreskin | 19 | N/A |
| Penis is not straight | 7 | N/A |
| Urine not coming out of the tip of the penis | 11 | N/A |
| My son had to have several procedures | 19 | N/A |
| Other (please specify) | 29 | N/A |
| **Before knowing that your son had hypospadias, were you keen to have him circumcised?** | | |
| Yes | 31 | 2 |
| No | 40 | 9 |
| I did not have a strong opinion about it | 12 | 3 |
| Not sure | 3 | 0 |
| **What could have helped you be more content with your decision?** | | |
| More appointments with the surgeon | 27 | 5 |
| A hypospadias parental decision-making aid | 33 | 7 |
| More research on the Internet | 11 | 2 |
| More time | 2 | 4 |
| Other (please specify) | 22 | 3 |

Additional file 2. Number of answers to the survey’s multiple-choice questions.
